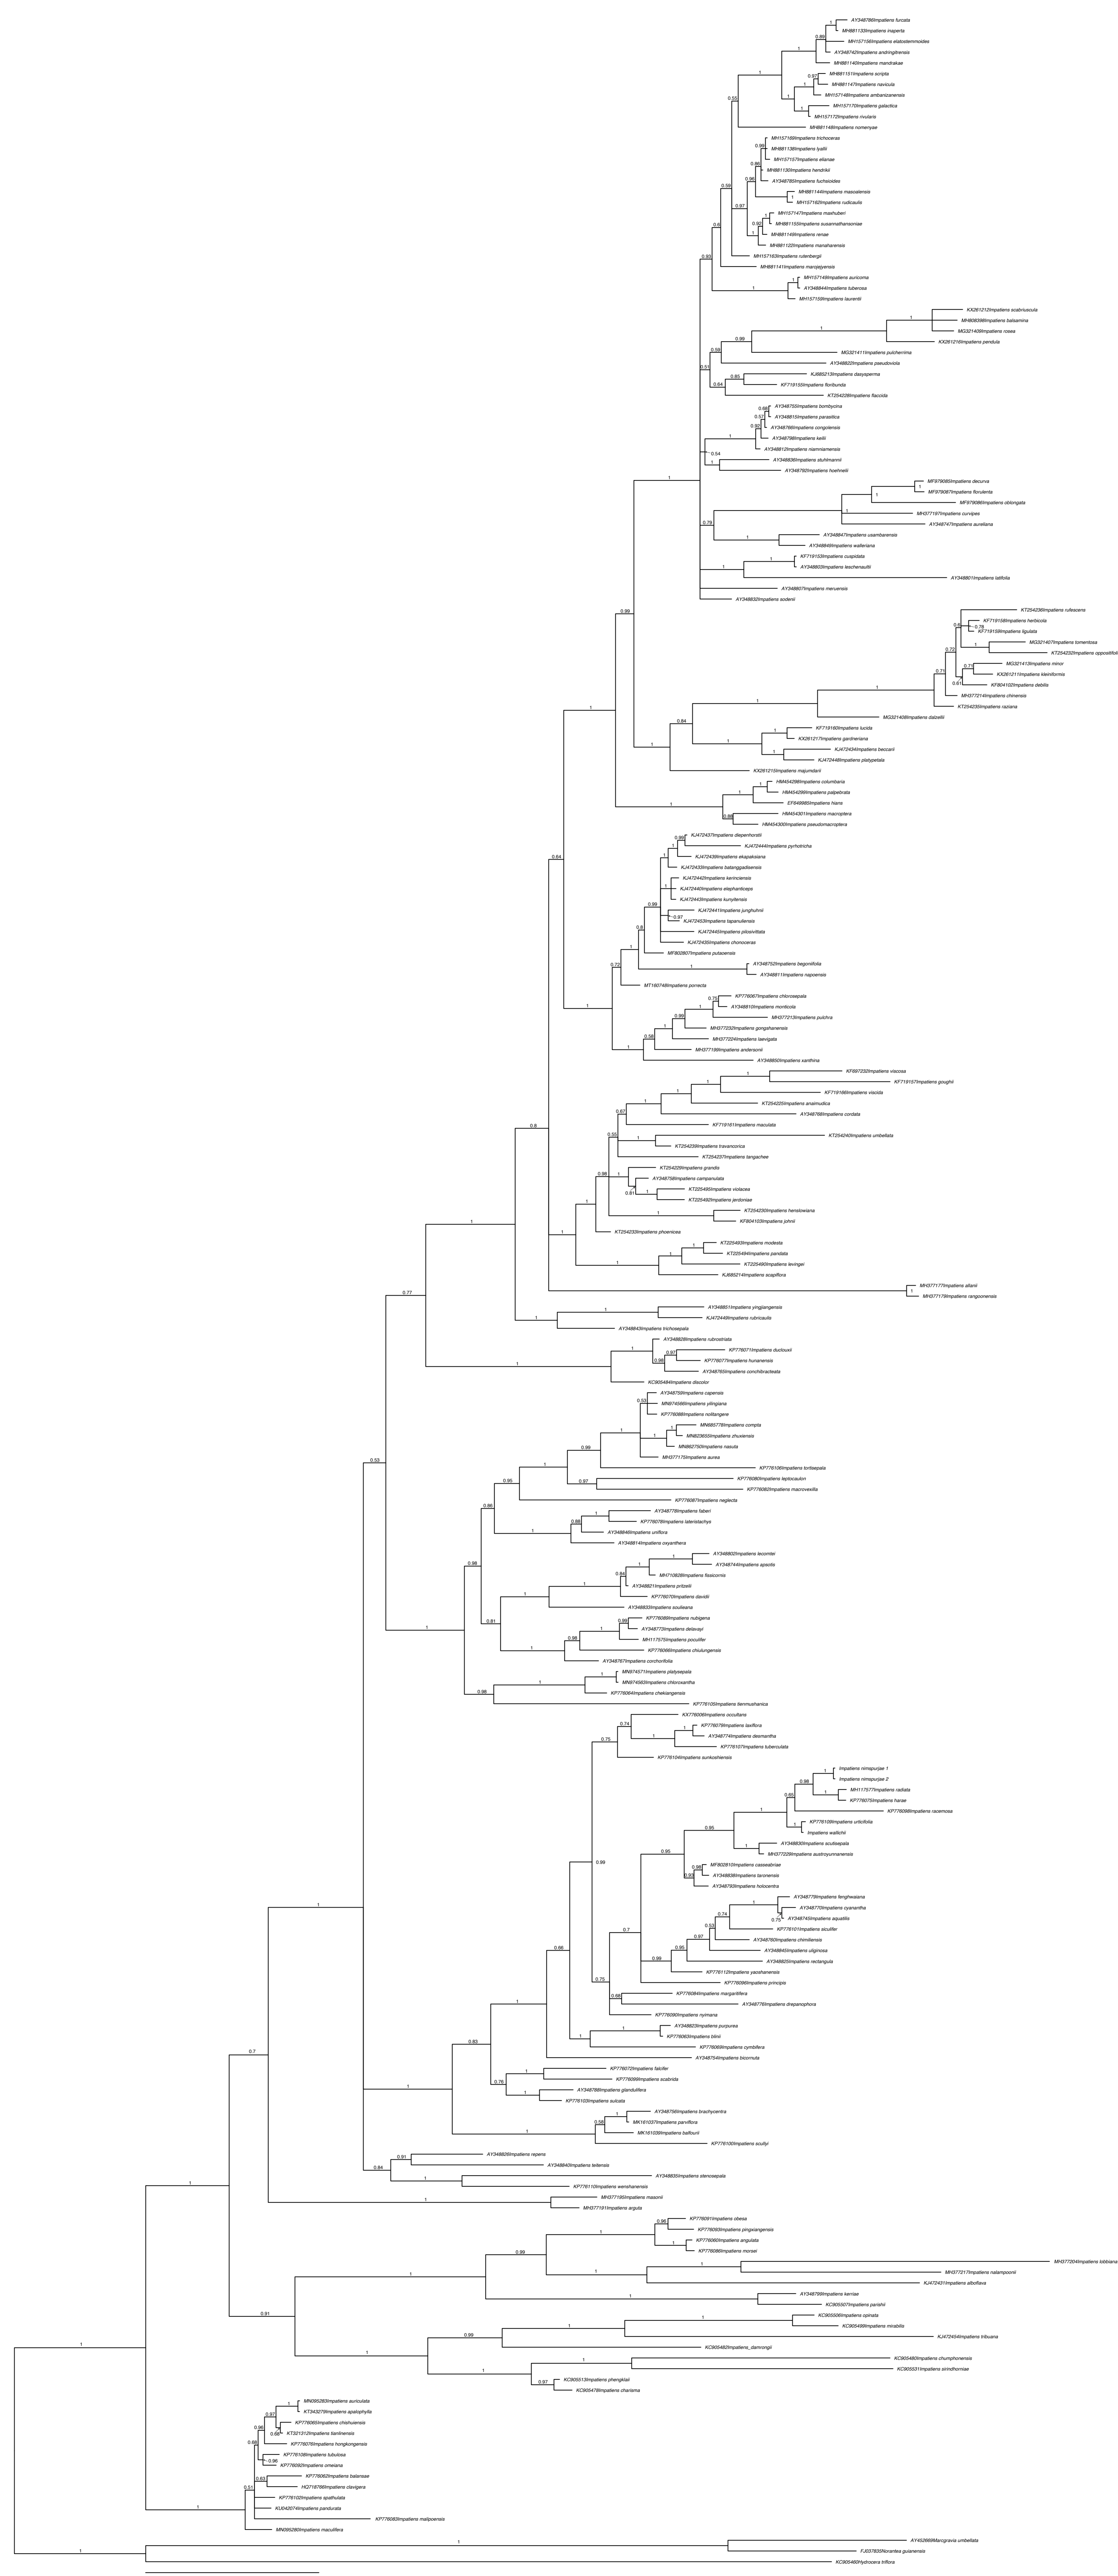

Source: https://storage.googleapis.com/plos-corpus-prod/10.1371/journal.pone.0274699/1/pone.0274699.s001.pdf
